# Supplementary material for: Embedding of atoms into the nanopore sites of the C6N6and C6N8porous carbon nitride monolayers with tunable electronic properties
Source: Royal Society of Chemistry journal article supplement (doi:10.1039/d0cp00093k), 2020-01-01
Supplement: d0cp00093k1.pdf [file d0cp00093k1.pdf]

# Supplementary Information // Embedding of atoms into the holey site of the $C_6N_6$ and $C_6N_8$ porous carbon nitride monolayers with tunable electronic properties

Asadollah Bafekry,<sup>\*,†</sup> Catherine Stampfl,<sup>¶</sup> Berna Akgenc,<sup>§</sup> Bohayra Mortazavi,<sup>||</sup>  
Mitra Ghergherehchi,<sup>\*,#</sup> and Ch. V. Nguyen<sup>@</sup>

<sup>†</sup>*Department of Physics, University of Guilan, 41335-1914, Rasht, Iran*

<sup>‡</sup>*Department of Physics, University of Antwerp, Groenenborgerlaan 171, B-2020 Antwerp,  
Belgium.*

<sup>¶</sup>*School of Physics, The University of Sydney, New South Wales 2006, Australia*

<sup>§</sup>*Department of Physics, Kirklareli University, Kirklareli, Turkey*

<sup>||</sup>*Institute of Continuum Mechanics, Leibniz Universitat Hannover, Appelstrabe 11, 30157  
Hannover, Germany*

<sup>⊥</sup>*Cluster of Excellence PhoenixD (Photonics, Optics, and Engineering-Innovation Across  
Disciplines), Gottfried Wilhelm Leibniz Universitat Hannover, Hannover, Germany*

<sup>#</sup>*College of Electronic and Electrical Engineering, Sungkyun kwan University, Suwon,  
Korea*

<sup>@</sup>*Department of Materials Science and Engineering, Le Quy Don Technical University,  
Hanoi, Vietnam*

E-mail: Bafekry.asad@gmail.com; mitragh@skku.edu

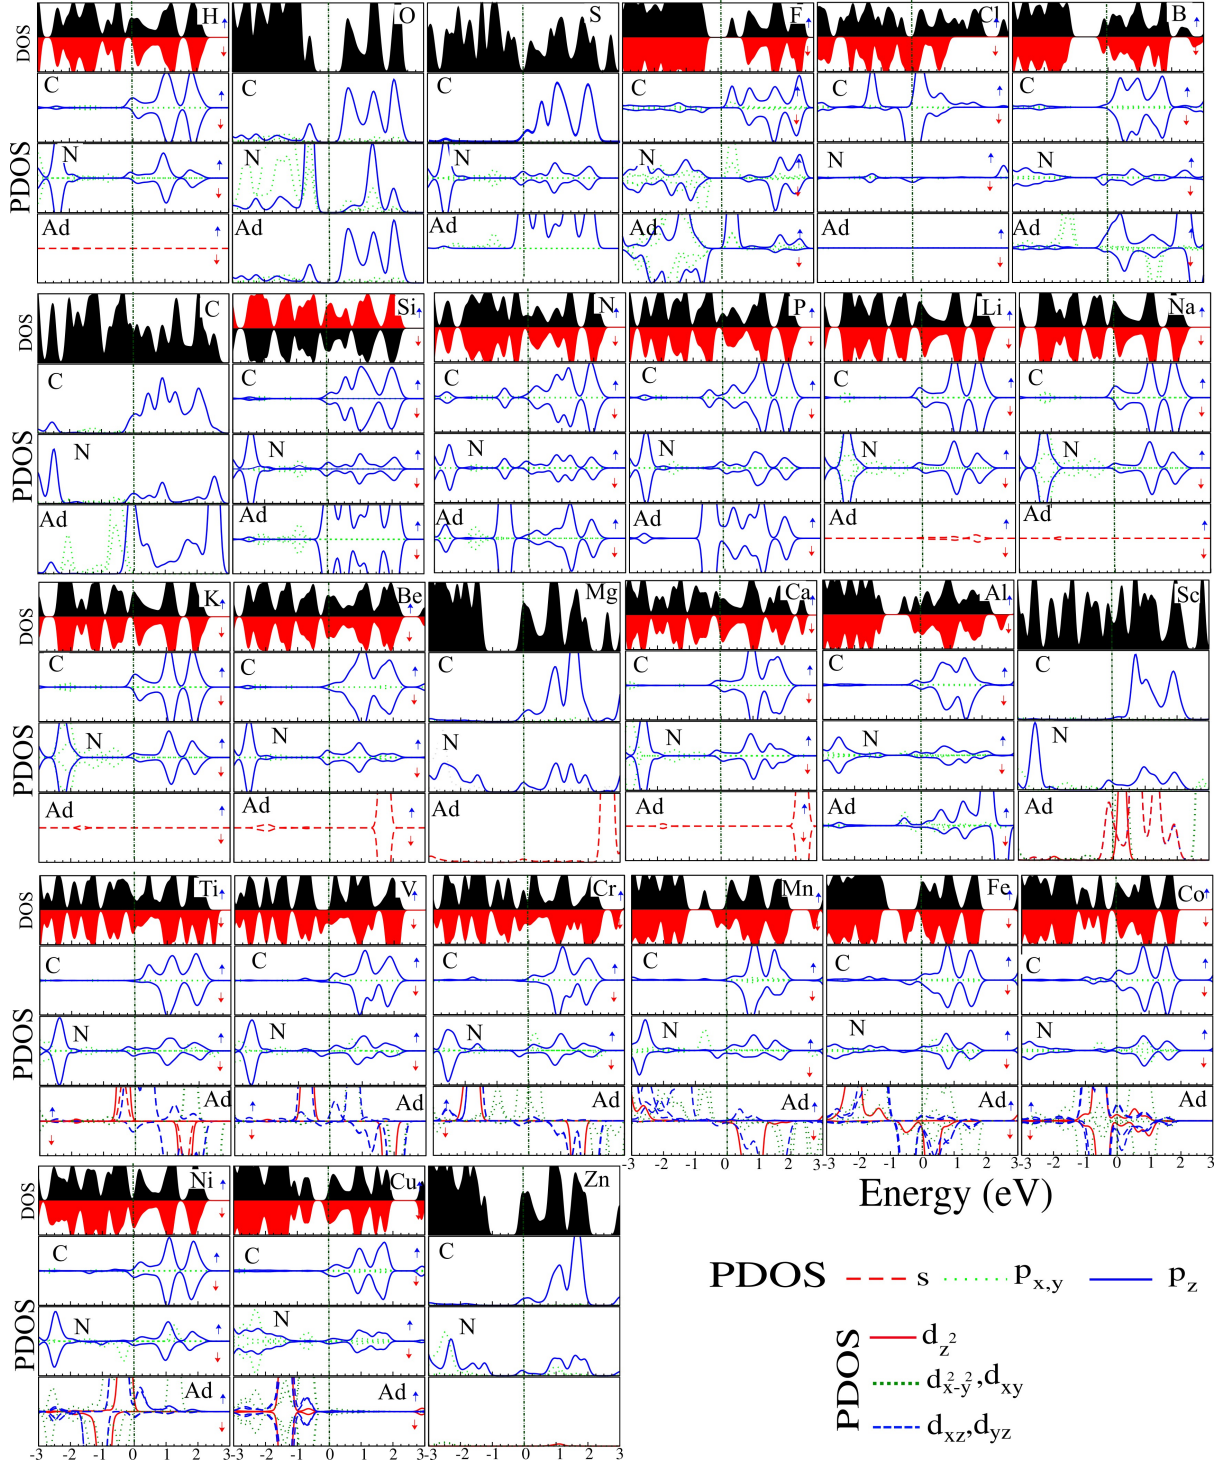

Figure 1: DOS and PDOS of different atoms embedded into the holey site of the  $C_6N_8$  monolayer. The zero of energy is set at  $E_F$ .
